# Supplementary material
Source: PubMed Central journal article supplement (PMC1166616)
Supplement: pnas_0503280102_5.pdf [file pnas_0503280102_5.pdf]

**Table 1. Long-term multilineage reconstitution of KLSflk2-CD34- cells from young and old mice**

| Cell type     | Mice  | Transient | Long-term |
|---------------|-------|-----------|-----------|
| KLSflk2+CD34+ | Young | 5/5       | 0/5       |
|               | Old   | 9/9       | 0/9       |
| KLSflk2-CD34+ | Young | 11/12     | 1/12      |
|               | Old   | 9/9       | 0/9       |
| KLSflk2-CD34- | Young | 1/8       | 7/8       |
|               | Old   | 5/12      | 7/12      |

Fifty cells of each of the three indicated surface phenotypes from young and old mice were purified by FACS sorting and competitively transplanted into young lethally irradiated congenic recipients along with  $3 \times 10^5$  congenic whole BM cells. Peripheral blood analysis at 4 weeks (short-term) and 28 weeks (long-term) with staining for B cells (B220+), T cells (TCR $\beta$ +), and myeloid cells (Mac1+) was performed. Recipients were considered multilineage reconstituted only if they read out in all three lineages. The number of recipient mice for each experiment is presented as the denominator and the number of recipients exhibiting either short-term or long-term multilineage reconstitution is presented as the numerator.
