# Supplementary material
Source: PubMed Central journal article supplement (PMC1166616)

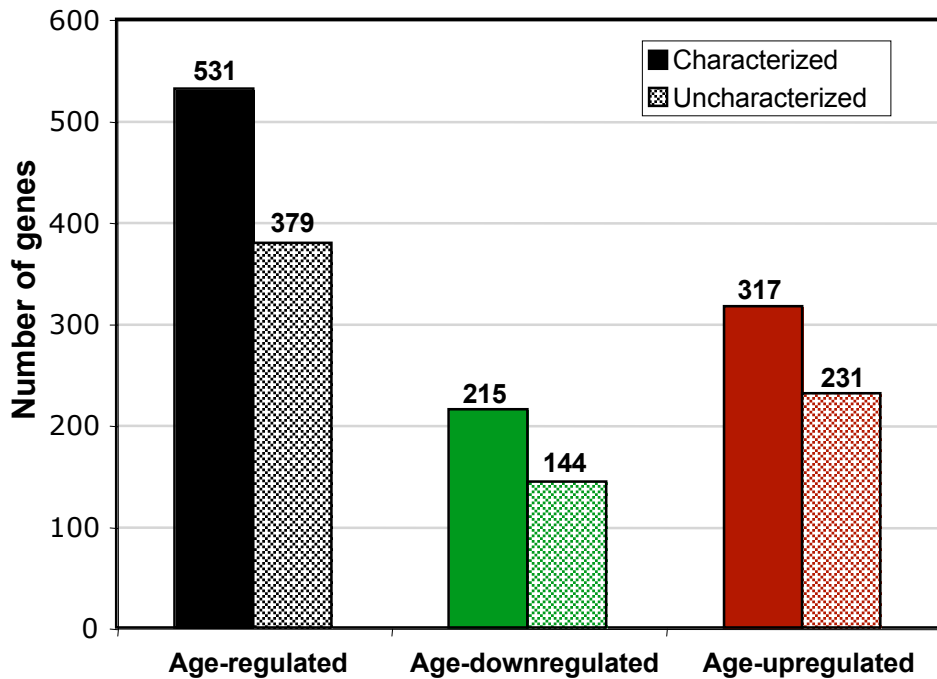

Supplement: pnas_0503280102_4.pdf [file pnas_0503280102_4.pdf]
